# Supplementary material for: Planar heterojunction perovskite/PC71BM solar cells with enhanced open-circuit voltage via a (2/1)-step spin-coating process
Source: Royal Society of Chemistry journal article supplement (doi:10.1039/c4ta03674c), 2014-01-01
Supplement: c4ta03674c1.pdf [file c4ta03674c1.pdf]

## Electronic supporting information

### Planar Heterojunction Perovskite/PC<sub>71</sub>BM Solar Cells with enhanced open-circuit voltage *via* (2/1)-step Spin-coating Process

Chien-Hung Chiang<sup>b</sup>; Zong-Liang Tseng<sup>b</sup>; Chun-Guey Wu<sup>a,b,\*</sup>

<sup>a</sup>Department of Chemistry and <sup>b</sup>Research Center for New Generation Photovoltaics, National Central University, Jhong-Li, 32001, Taiwan, ROC.

E-mail address of Professor C. G. Wu: t610002@cc.ncu.edu.tw

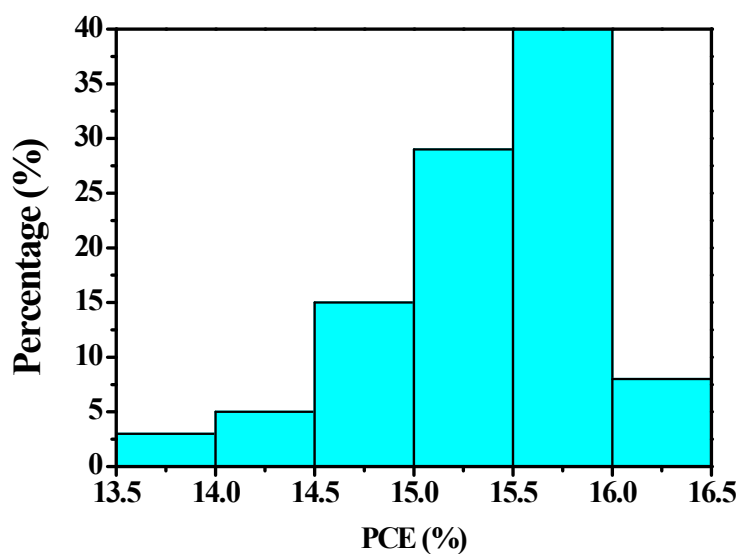

Figure S1: Device performance statistics based on 50 devices

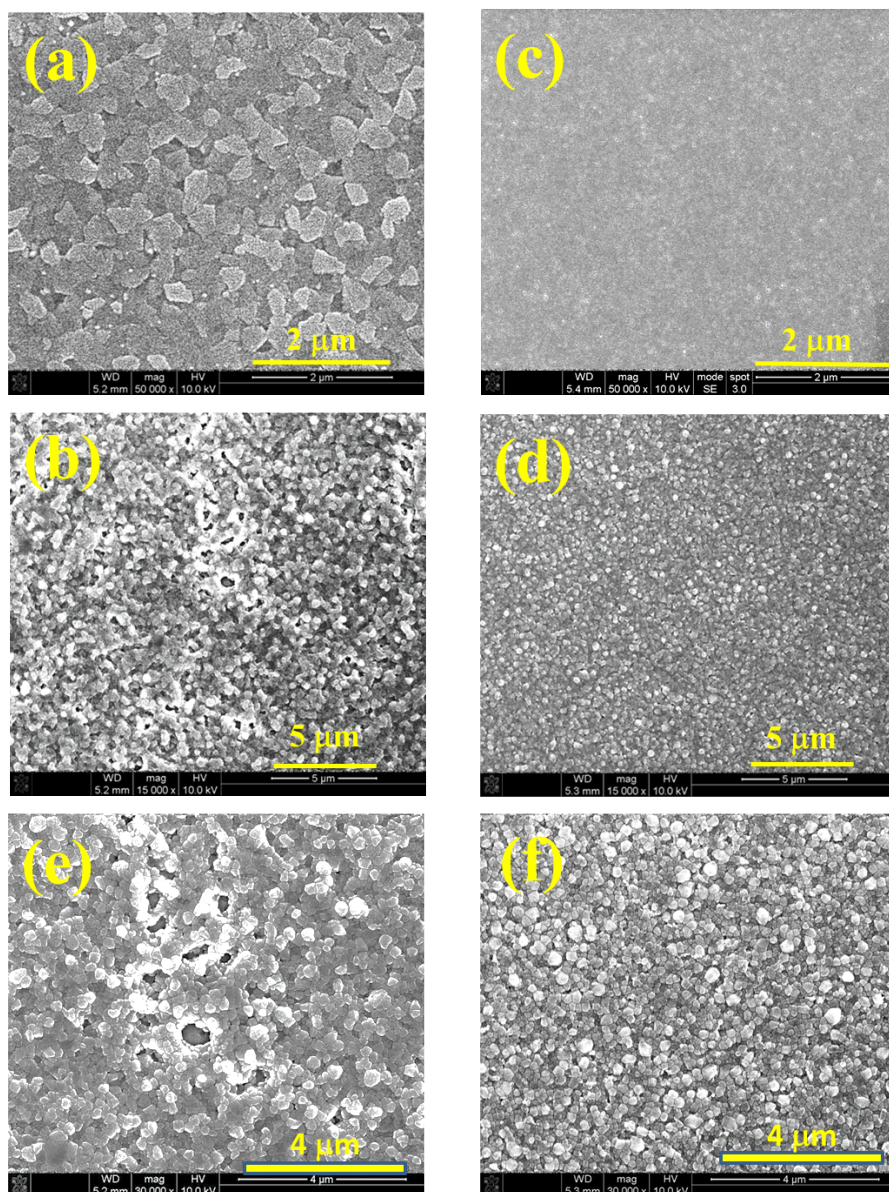

Figure S2: EM micrographs of PEDOT:PSS films and PEDOT:PSS/perovskite films obtained from different fabrication condition. (a) PEDOT:PSS film deposited on cold ITO; (b, e) Perovskite film deposited on (a) with different magnification; (c) PEDOT:PSS film deposited on preheated ITO; (d, f) Perovskite film deposited on (c) with different magnification.

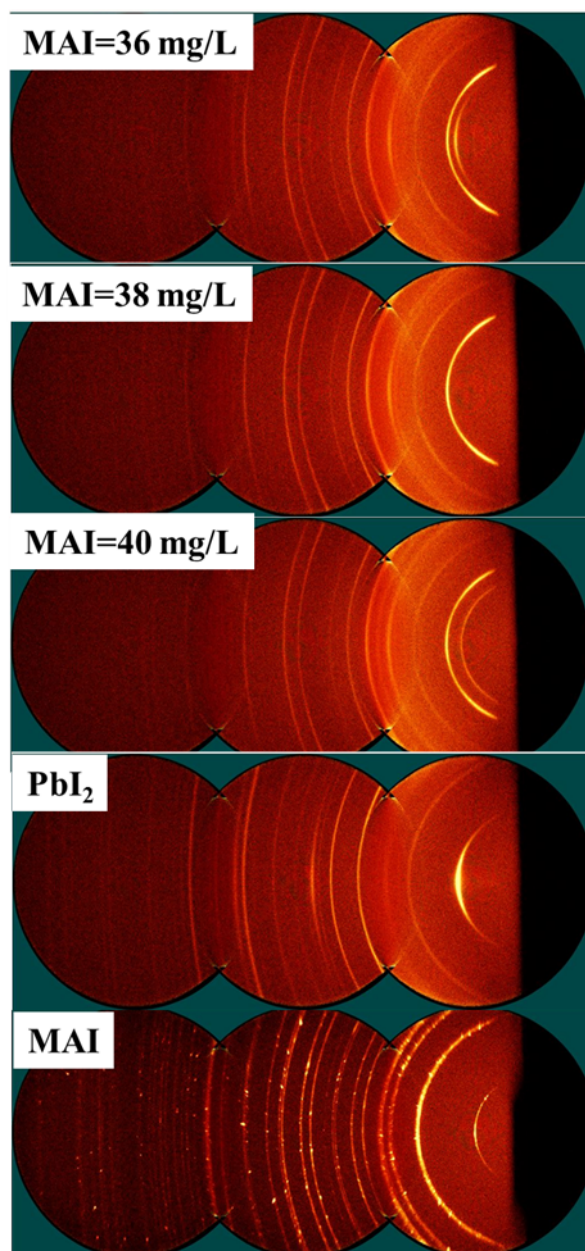

Figure S3: Original 2D XRD data of perovskite films and related compounds.

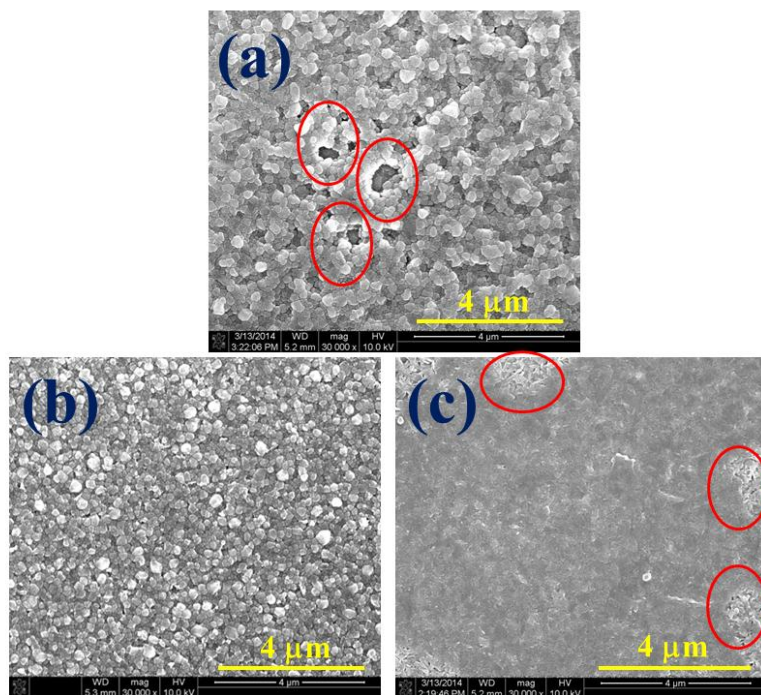

Figure S4: SEM micrographs of perovskite film prepared from different MAI concentration. (a) 36 mg/mL (b) 38 mg/mL (c) 40 mg/mL (red circle is the defect sites)

S1: L. Etgar, P. Gao, Z. Xue, Q. Peng, A. K. Chandiran, B. Liu, M. K. Nazeeruddin, M. Grätzel, *J. Am. Chem. Soc.* 2012, **134**, 17396.
